# Supplementary material for: The TLR3 L412F polymorphism prevents TLR3-mediated tumor cell death induction in pediatric sarcomas
Source: PubMed Central journal article supplement (PMC10326074; doi:10.1038/s41420-023-01513-y), 2023-07-07

Full and uncropped western blot for Figure 2A

Lanes 1, 2 are on the figure

TLR3

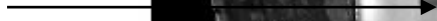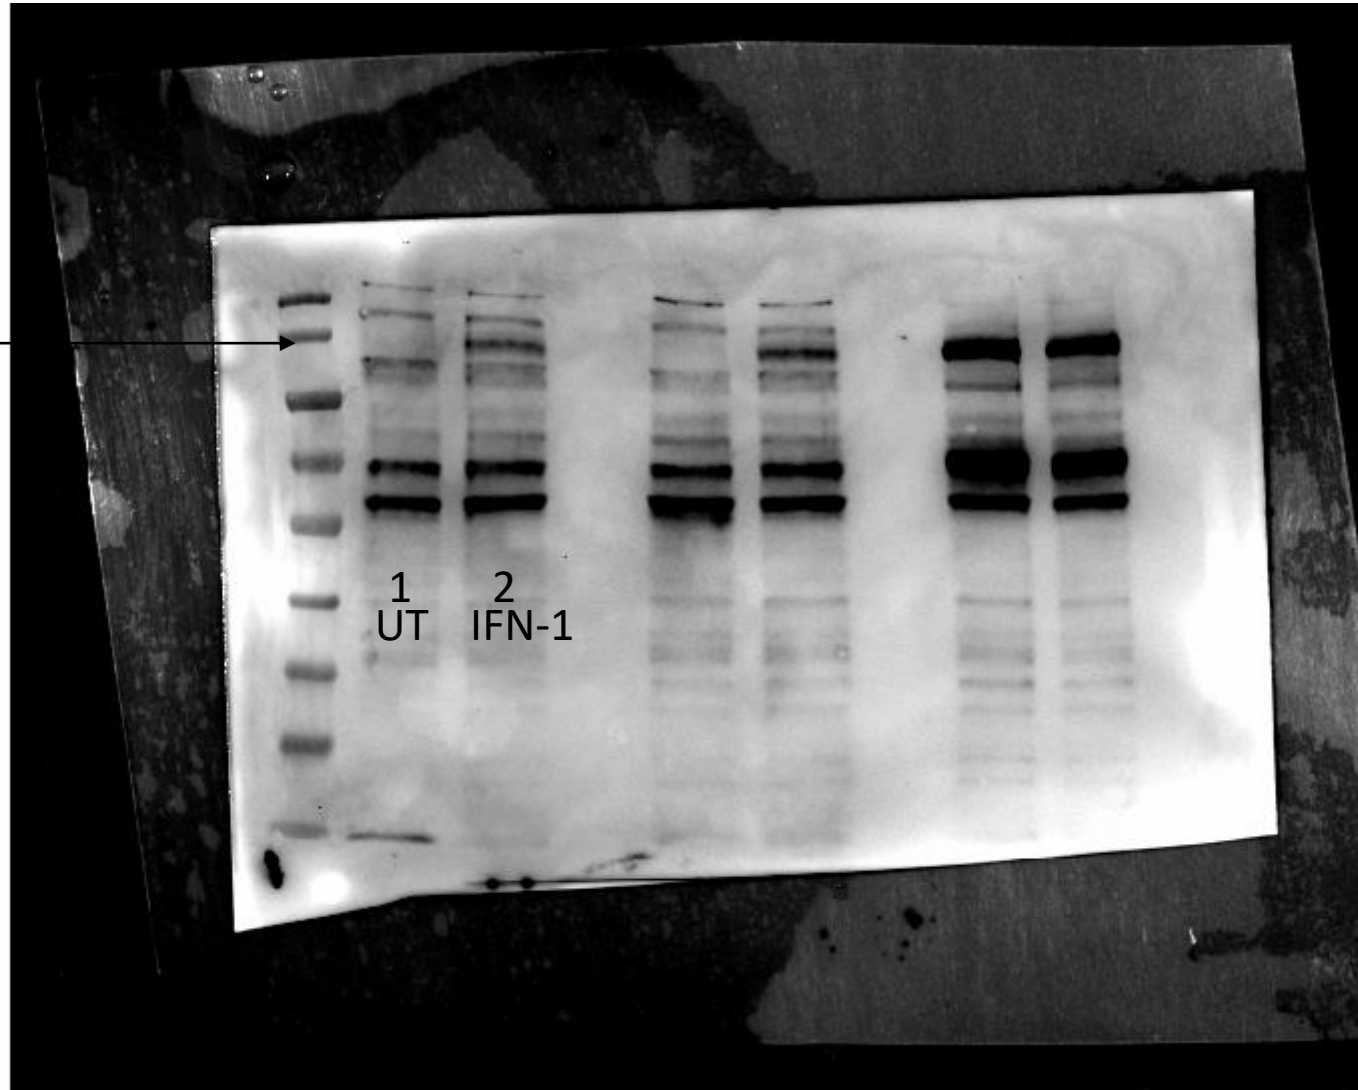

Full and uncropped western blot for Figure 2A  
Lanes 1, 2 are on the figure

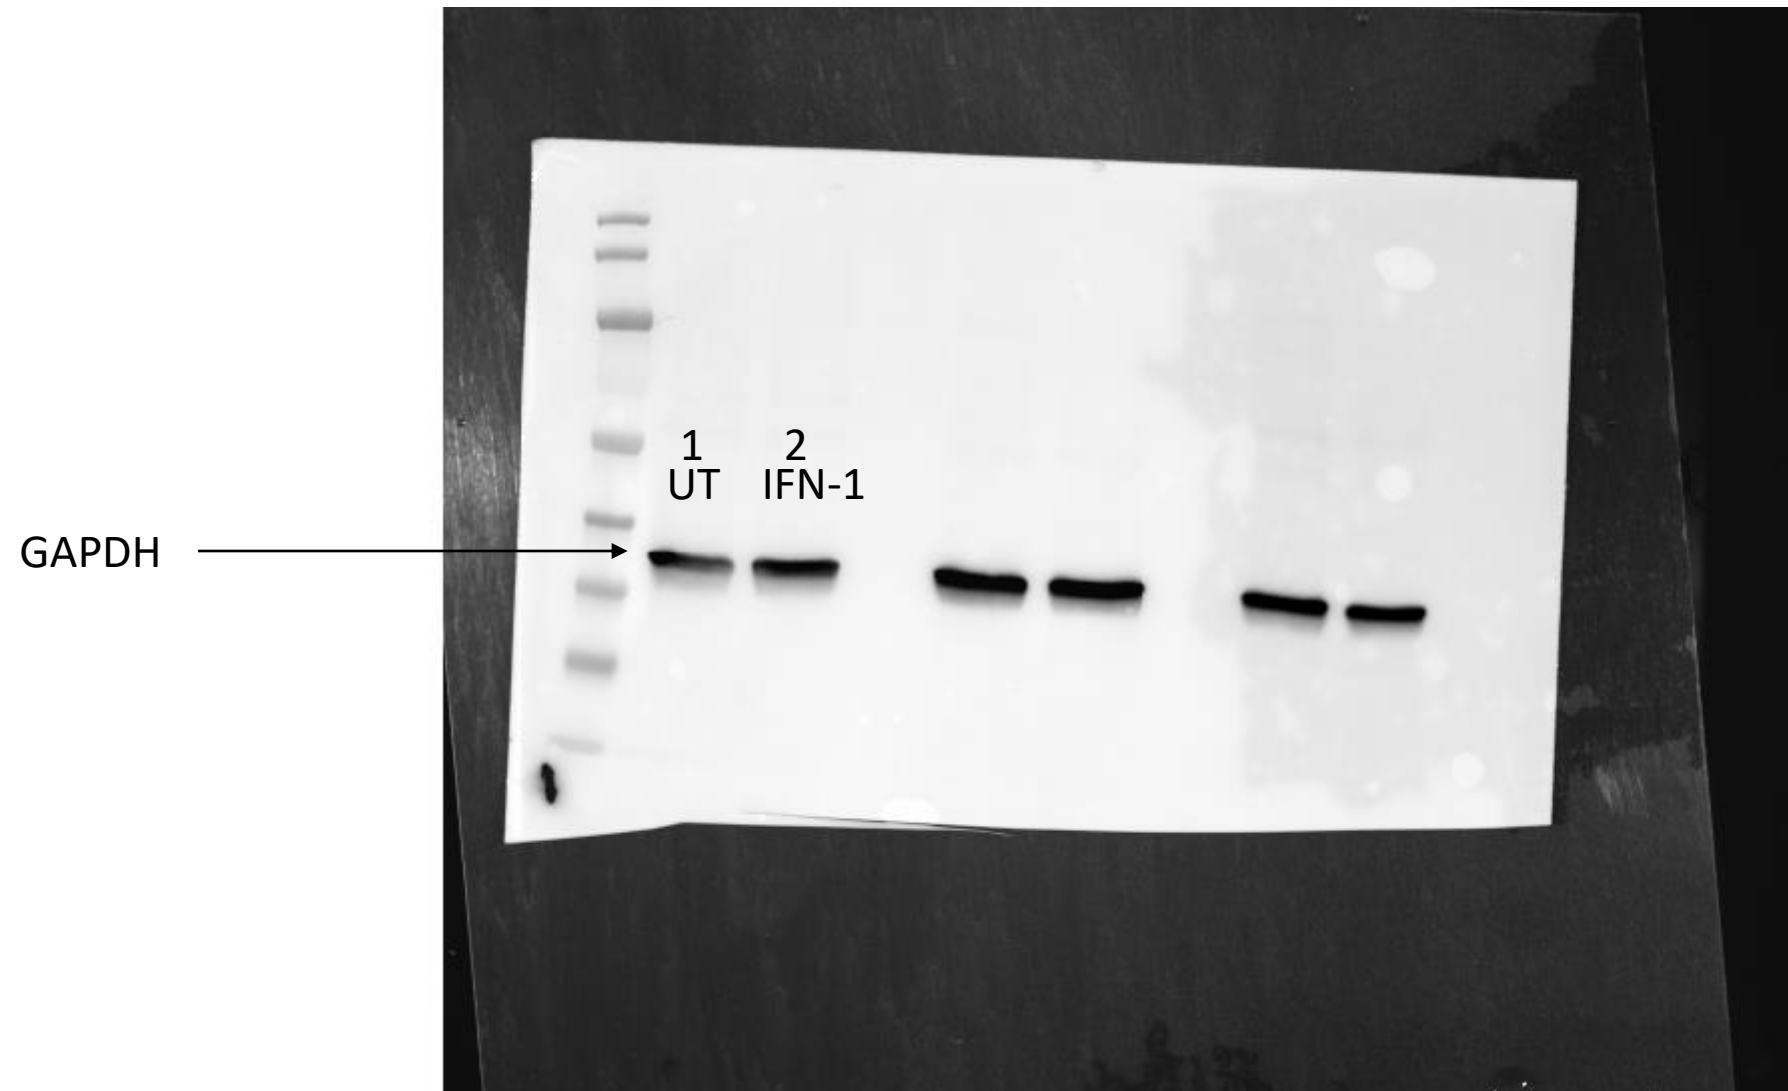

Full and uncropped western blot for Figure S2A

Lanes 1, 2 are on the figure

TLR3

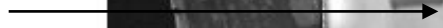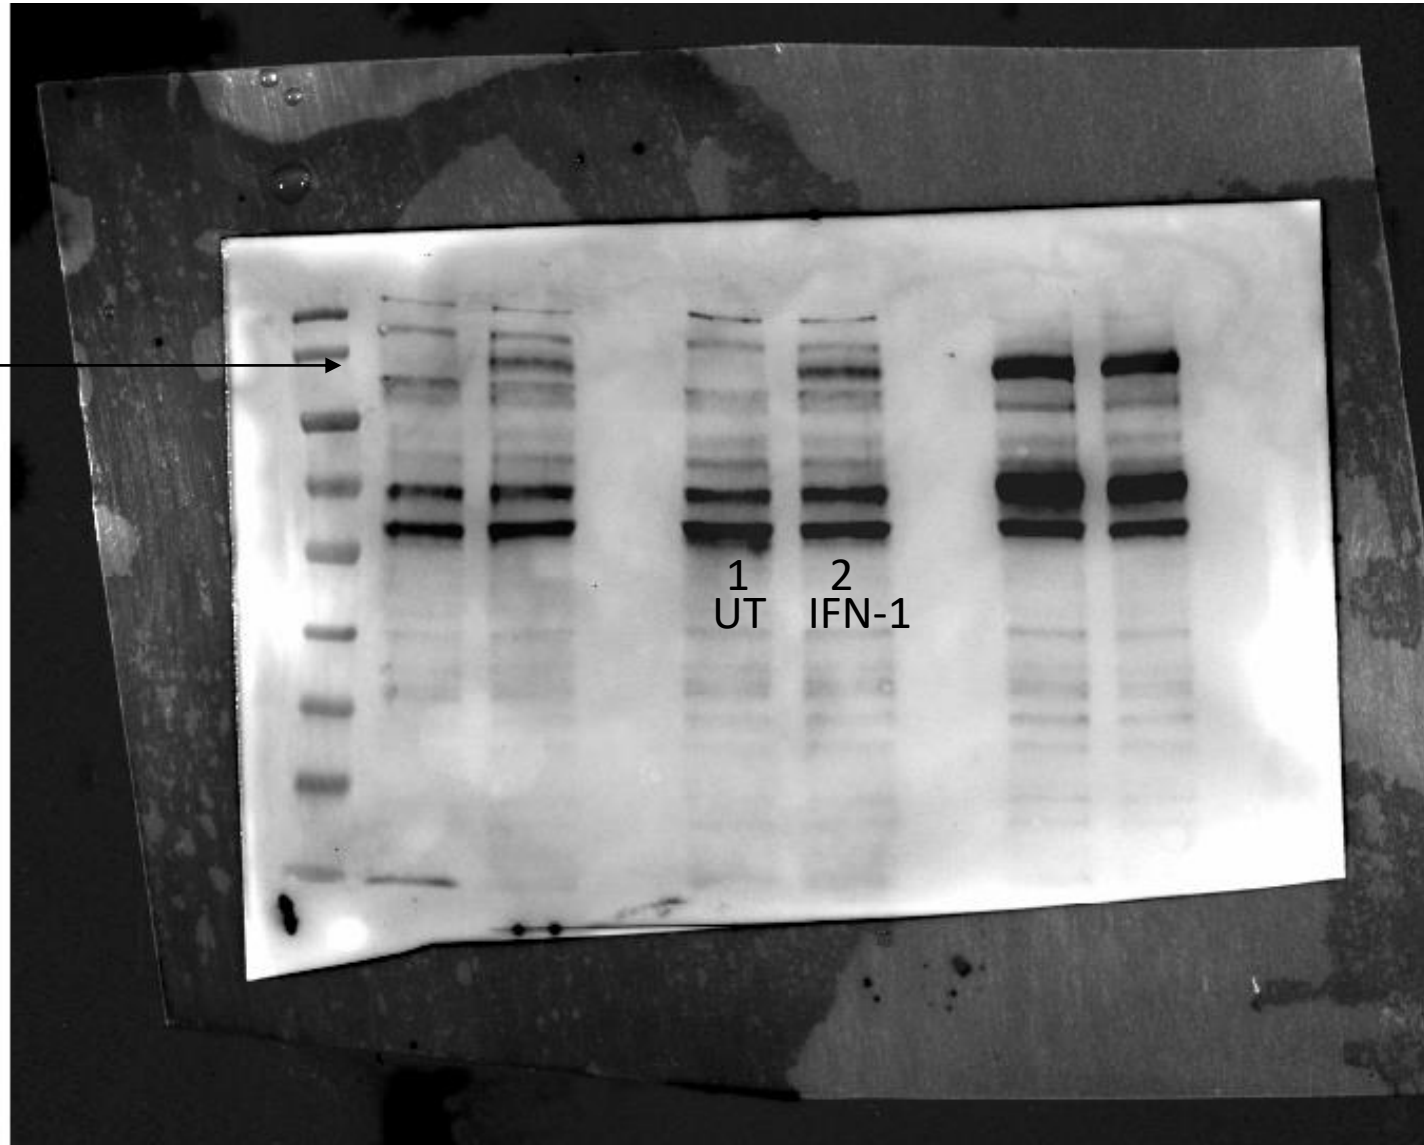

Full and uncropped western blot for Figure S2A  
Lanes 1, 2 are on the figure

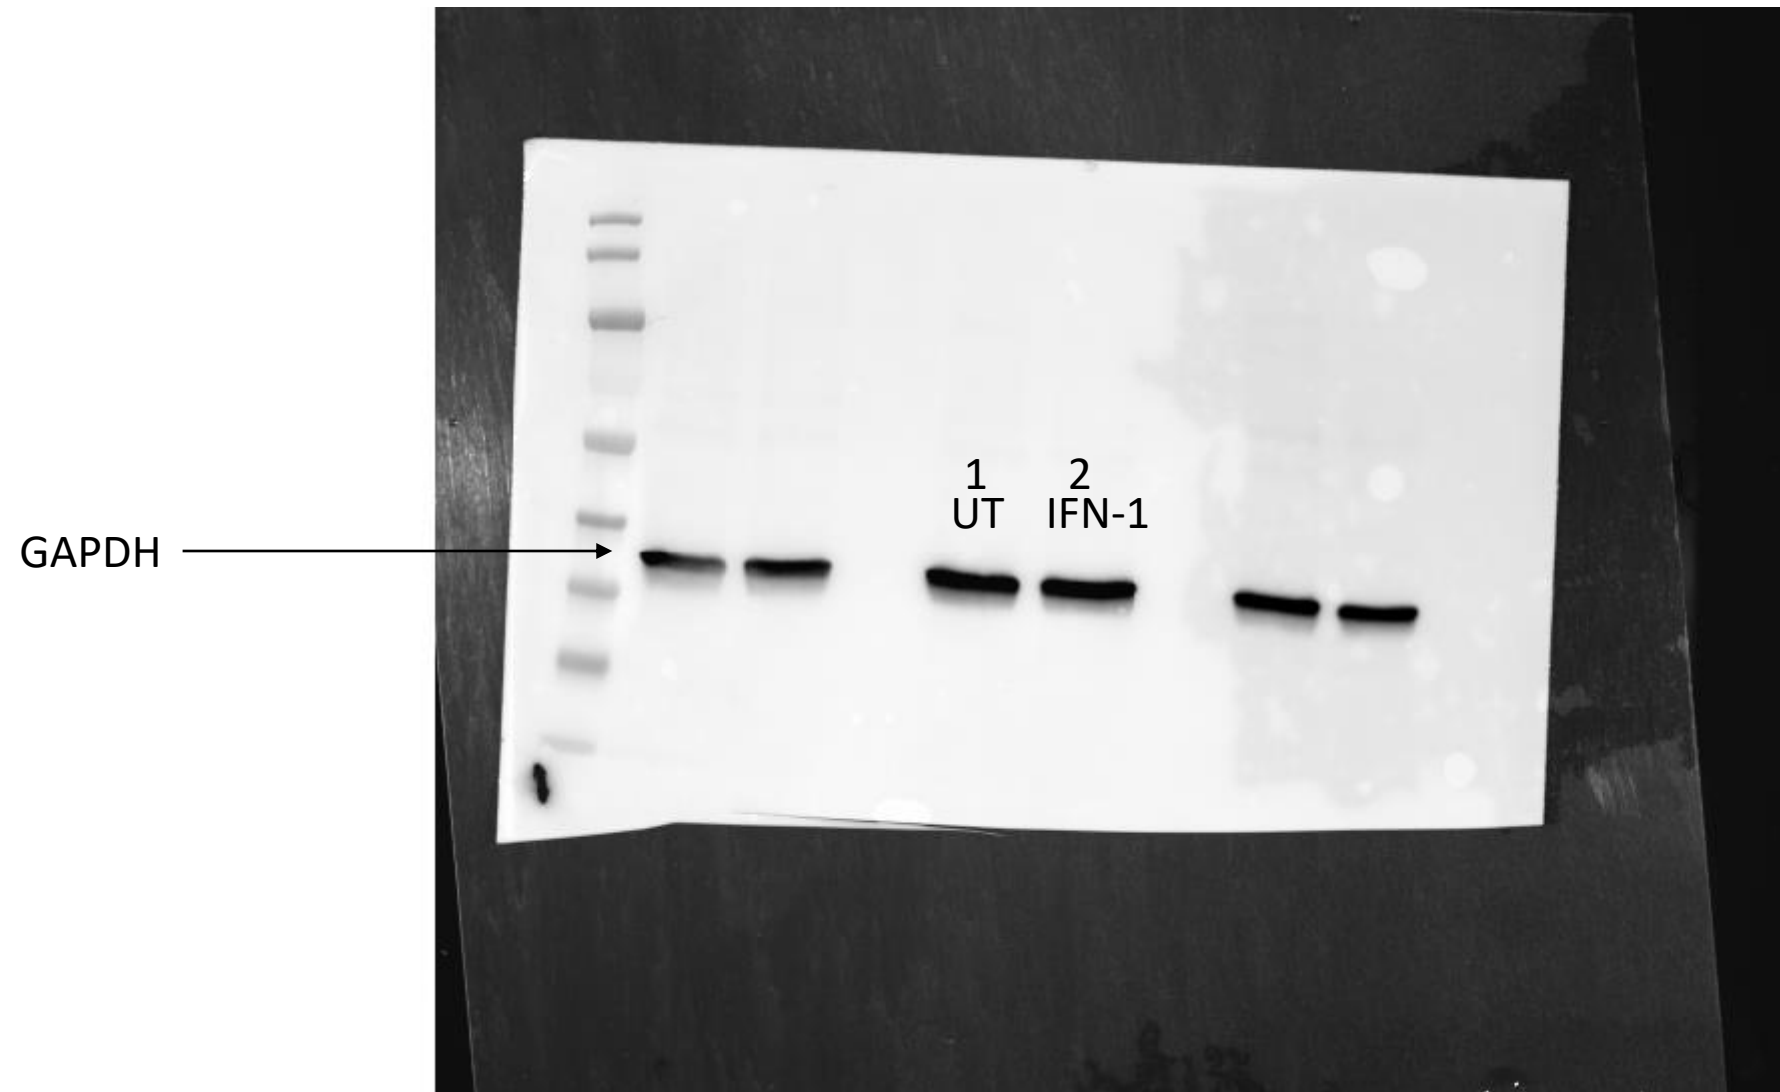

Full and uncropped western blot for Figure S2B  
Lanes 1, 2 are on the figure

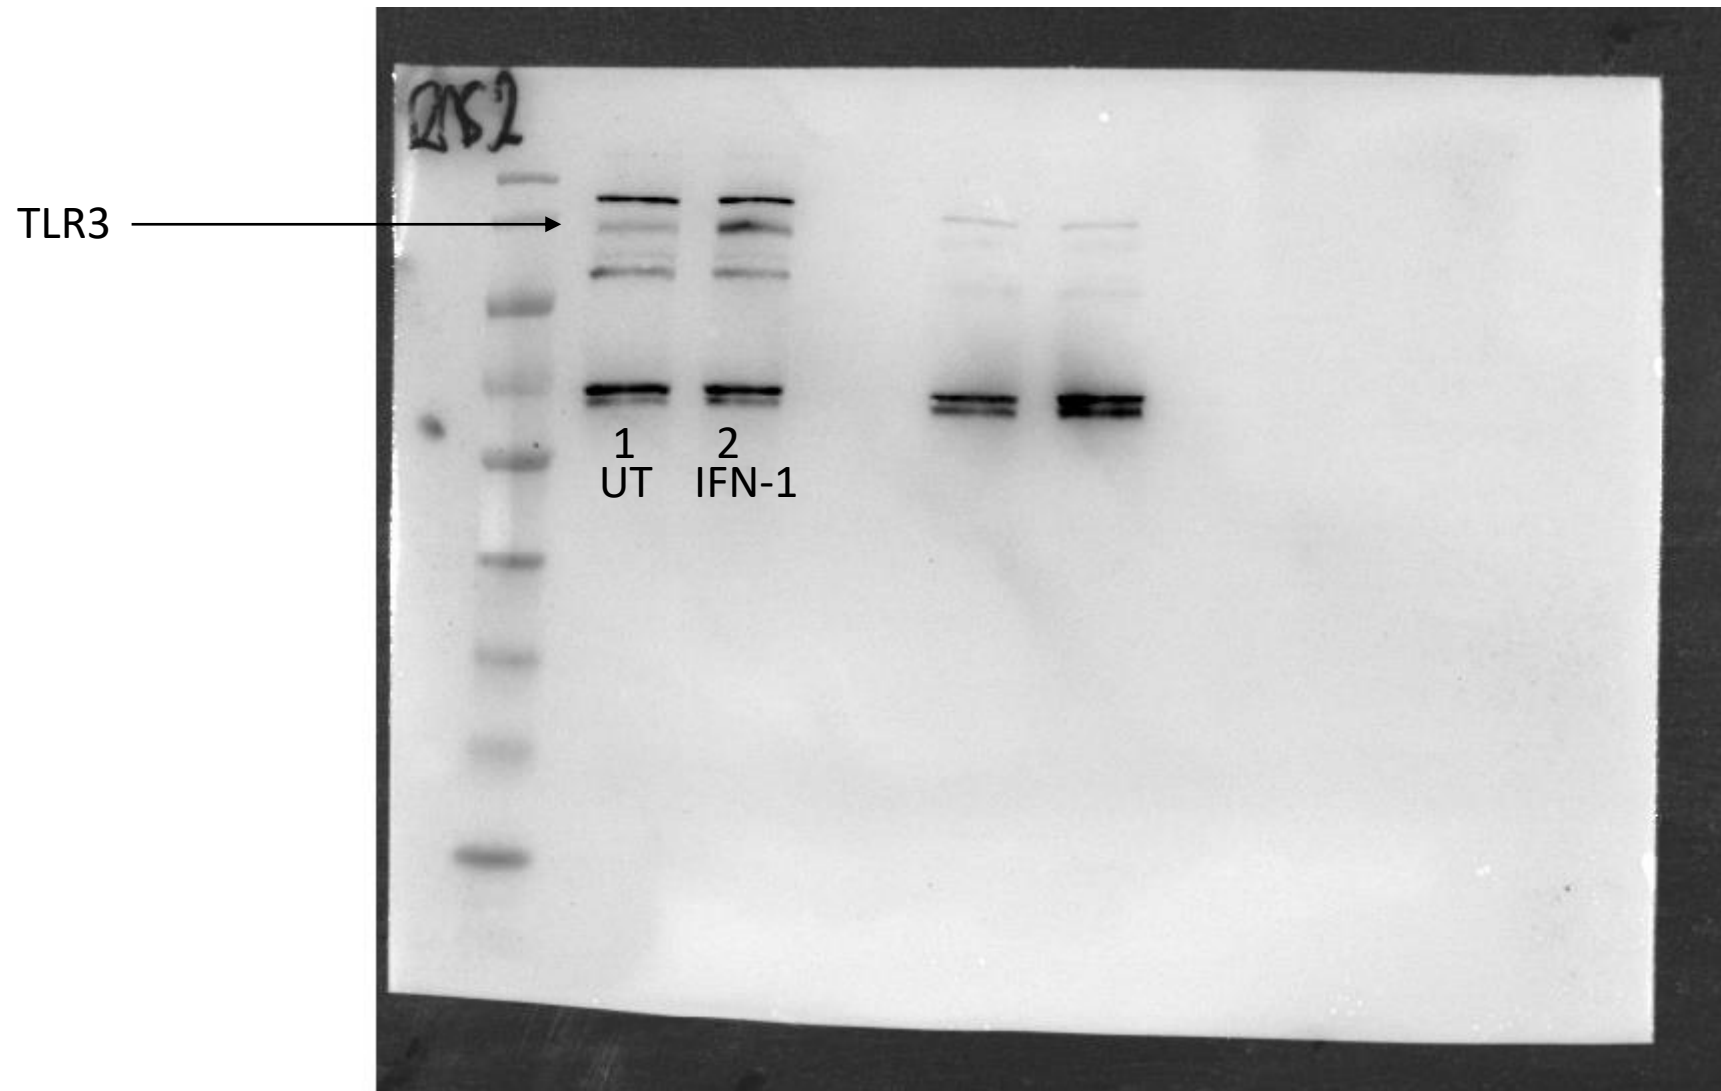

Full and uncropped western blot for Figure S2B  
Lanes 1, 2 are on the figure

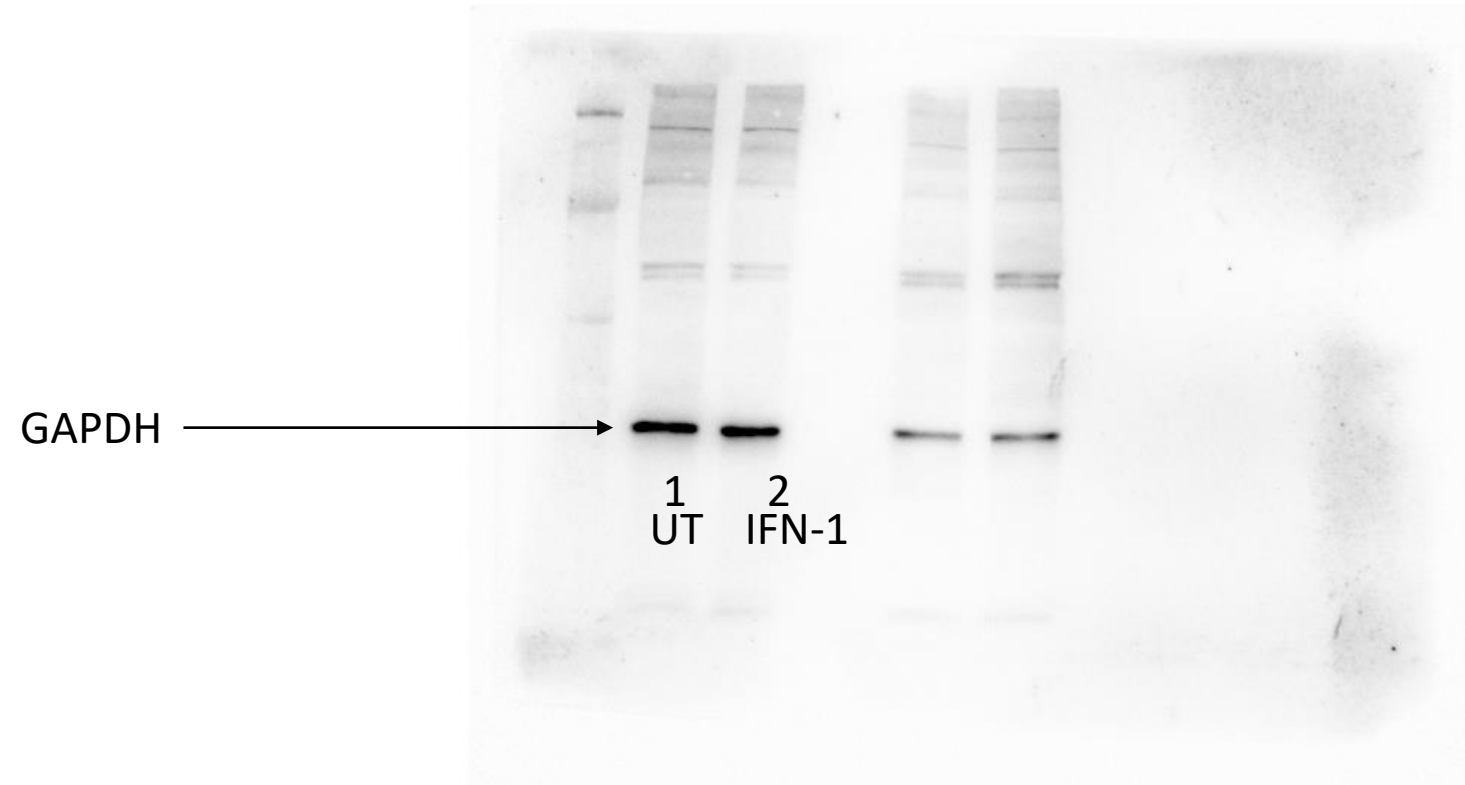

Full and uncropped western blot for Figure S3A  
Lanes 1, 2 are on the figure

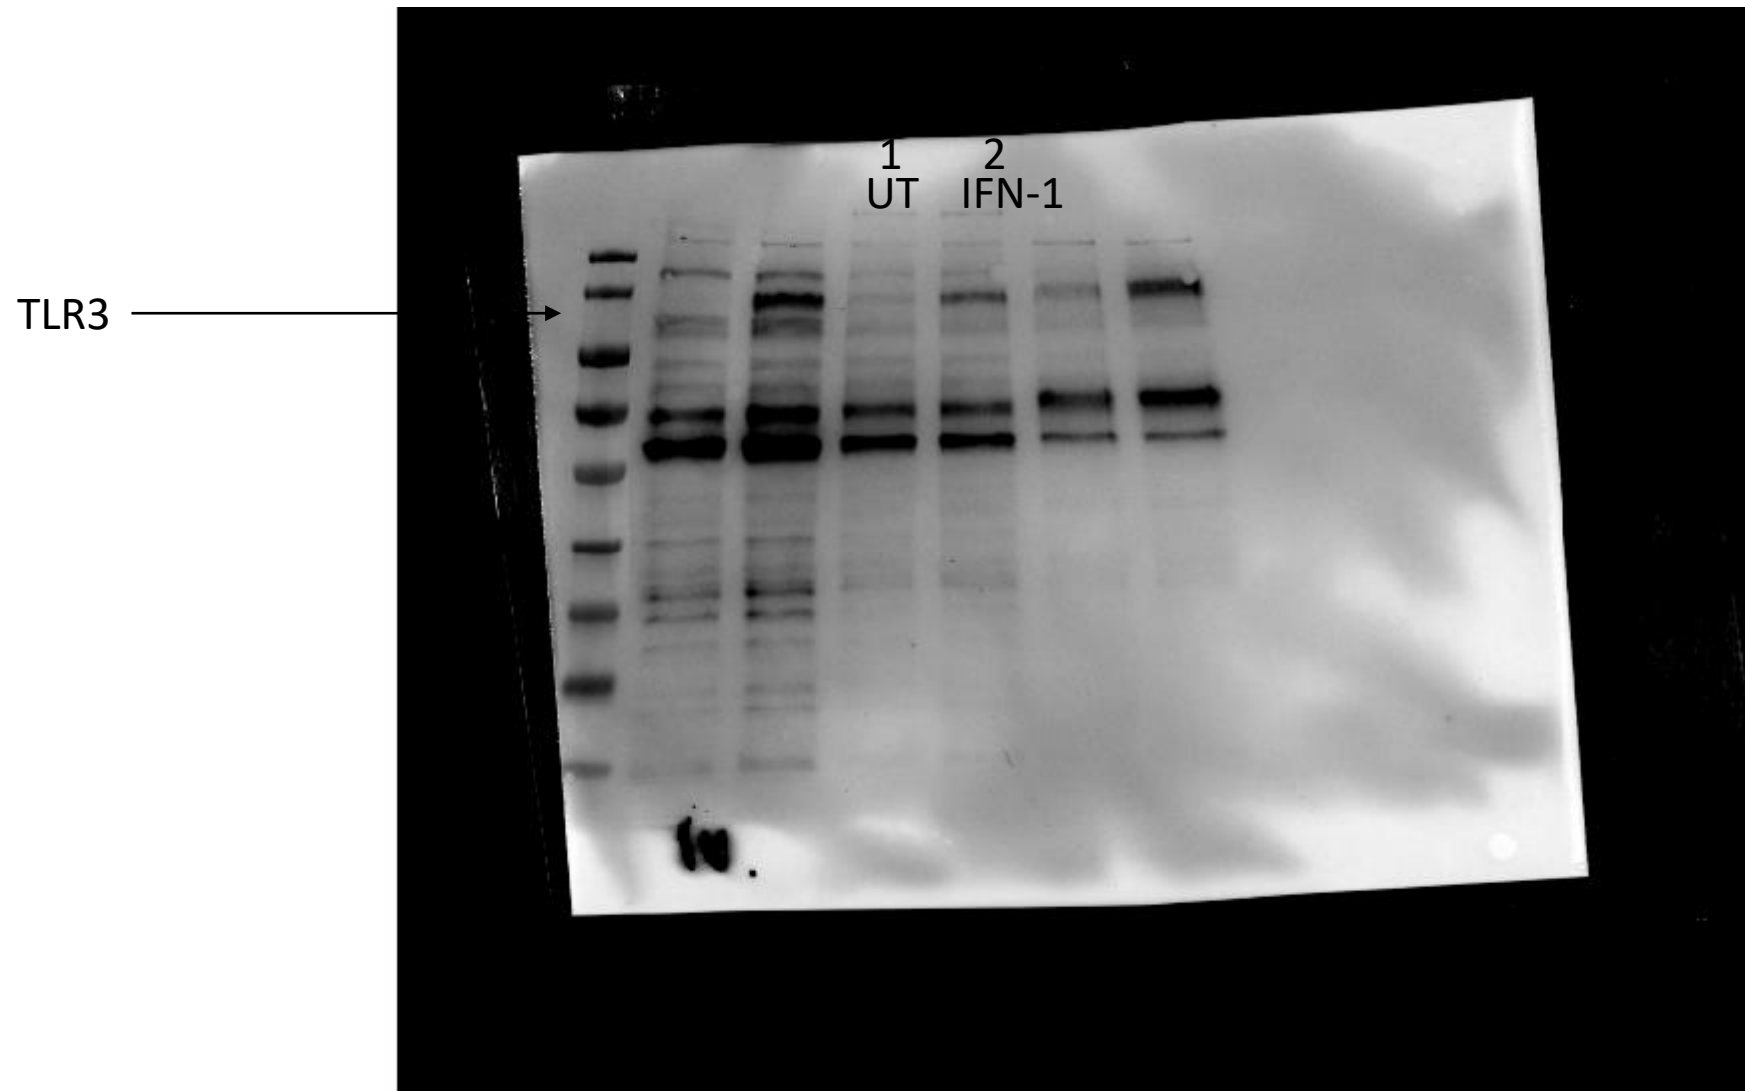

Full and uncropped western blot for Figure S3A  
Lanes 1, 2 are on the figure

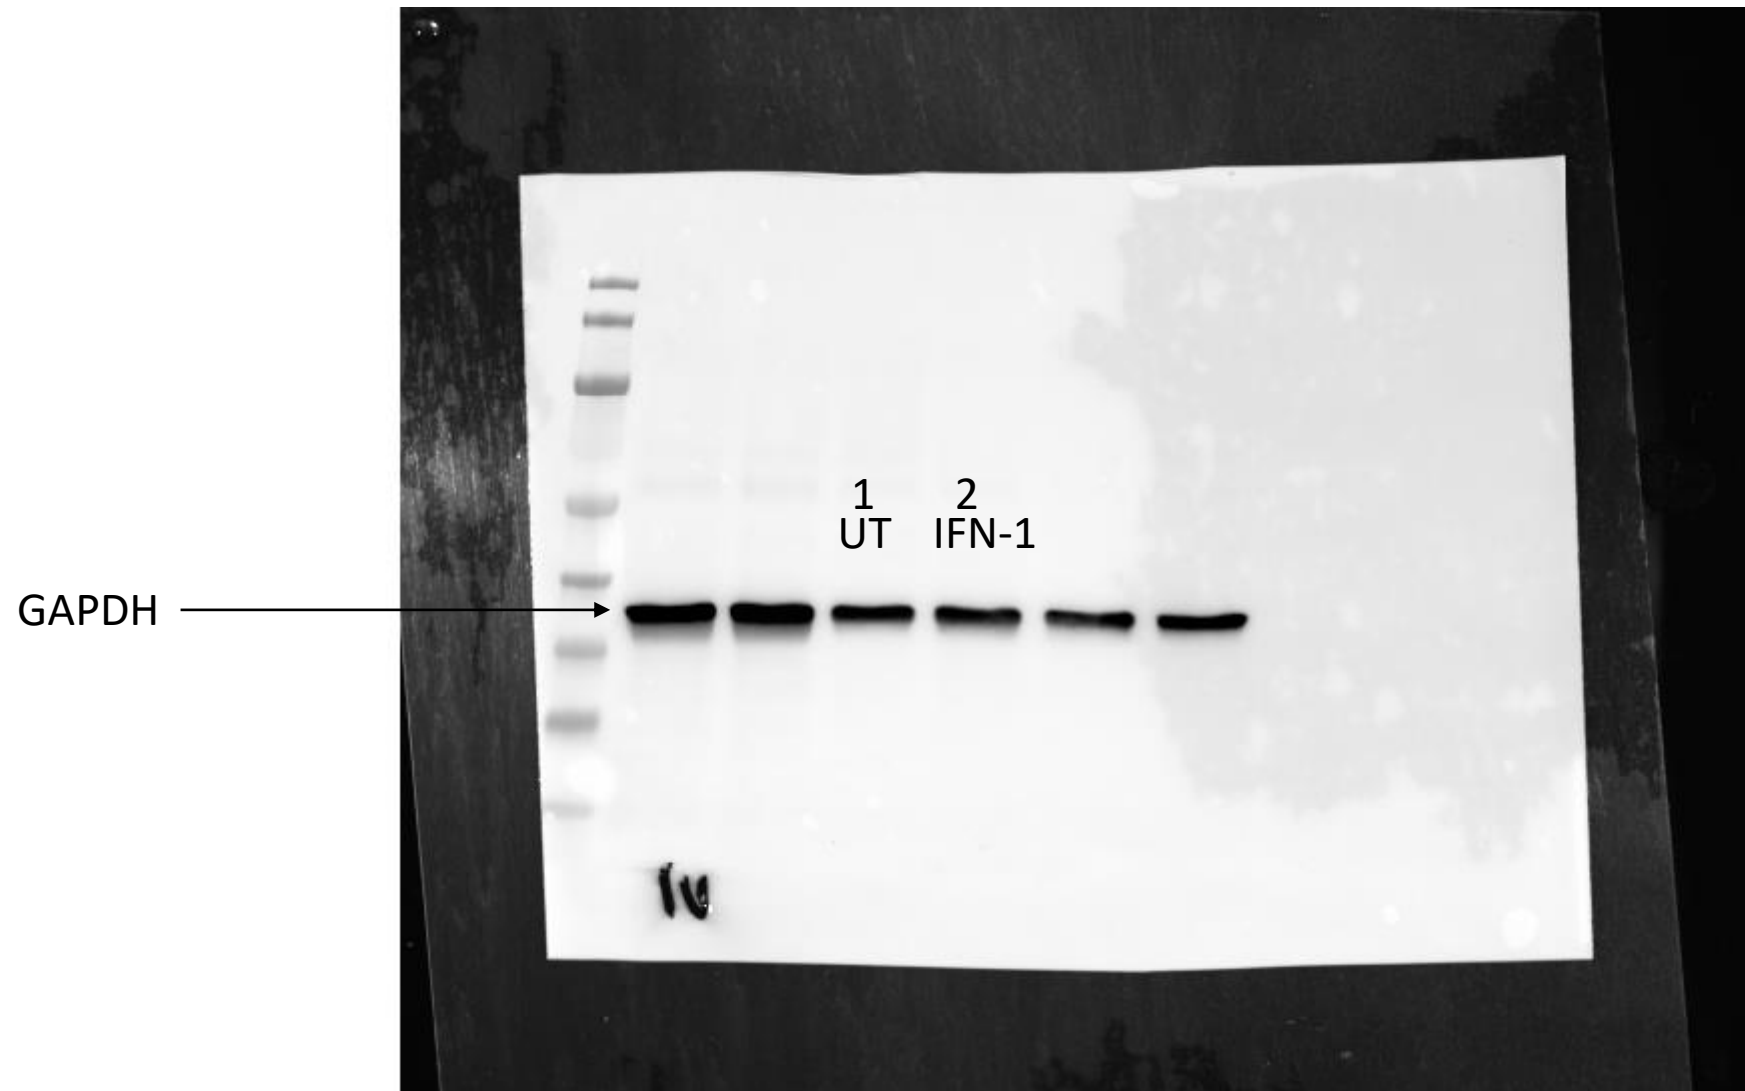



Full and uncropped western blot for Figure S3C  
Lanes 1, 2 are on the figure

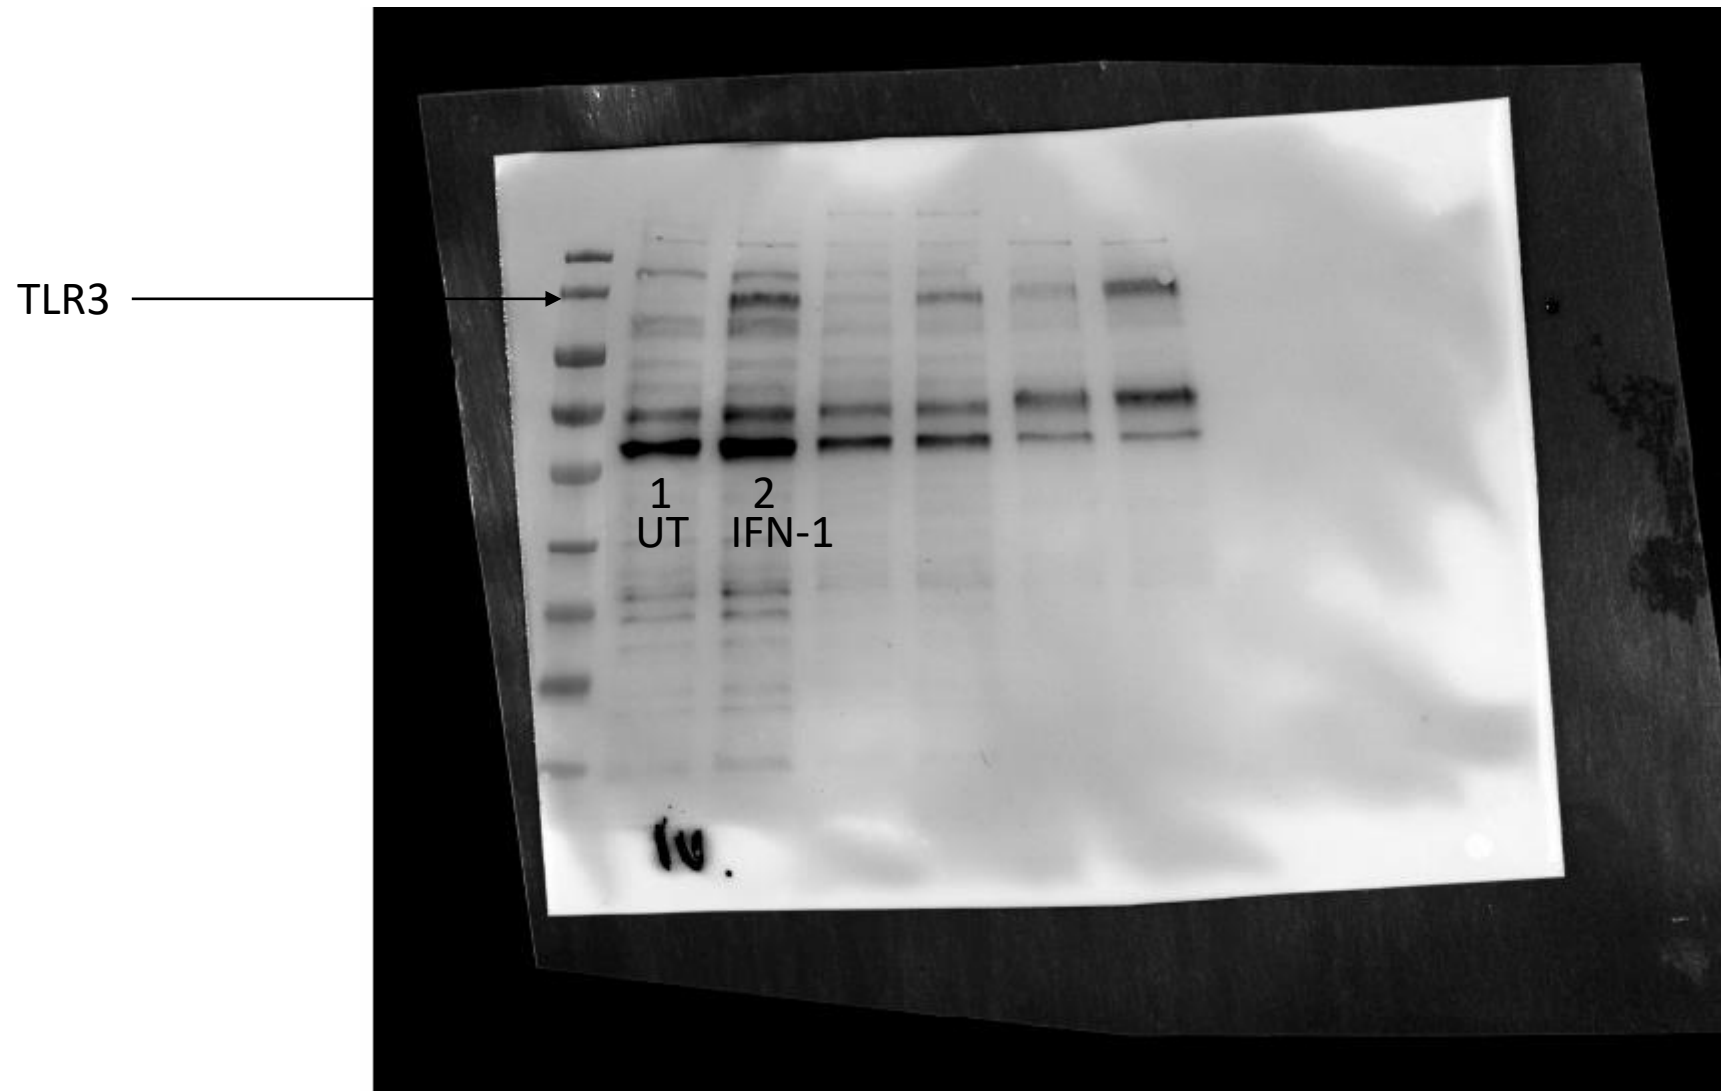

Full and uncropped western blot for Figure S3C  
Lanes 1, 2 are on the figure

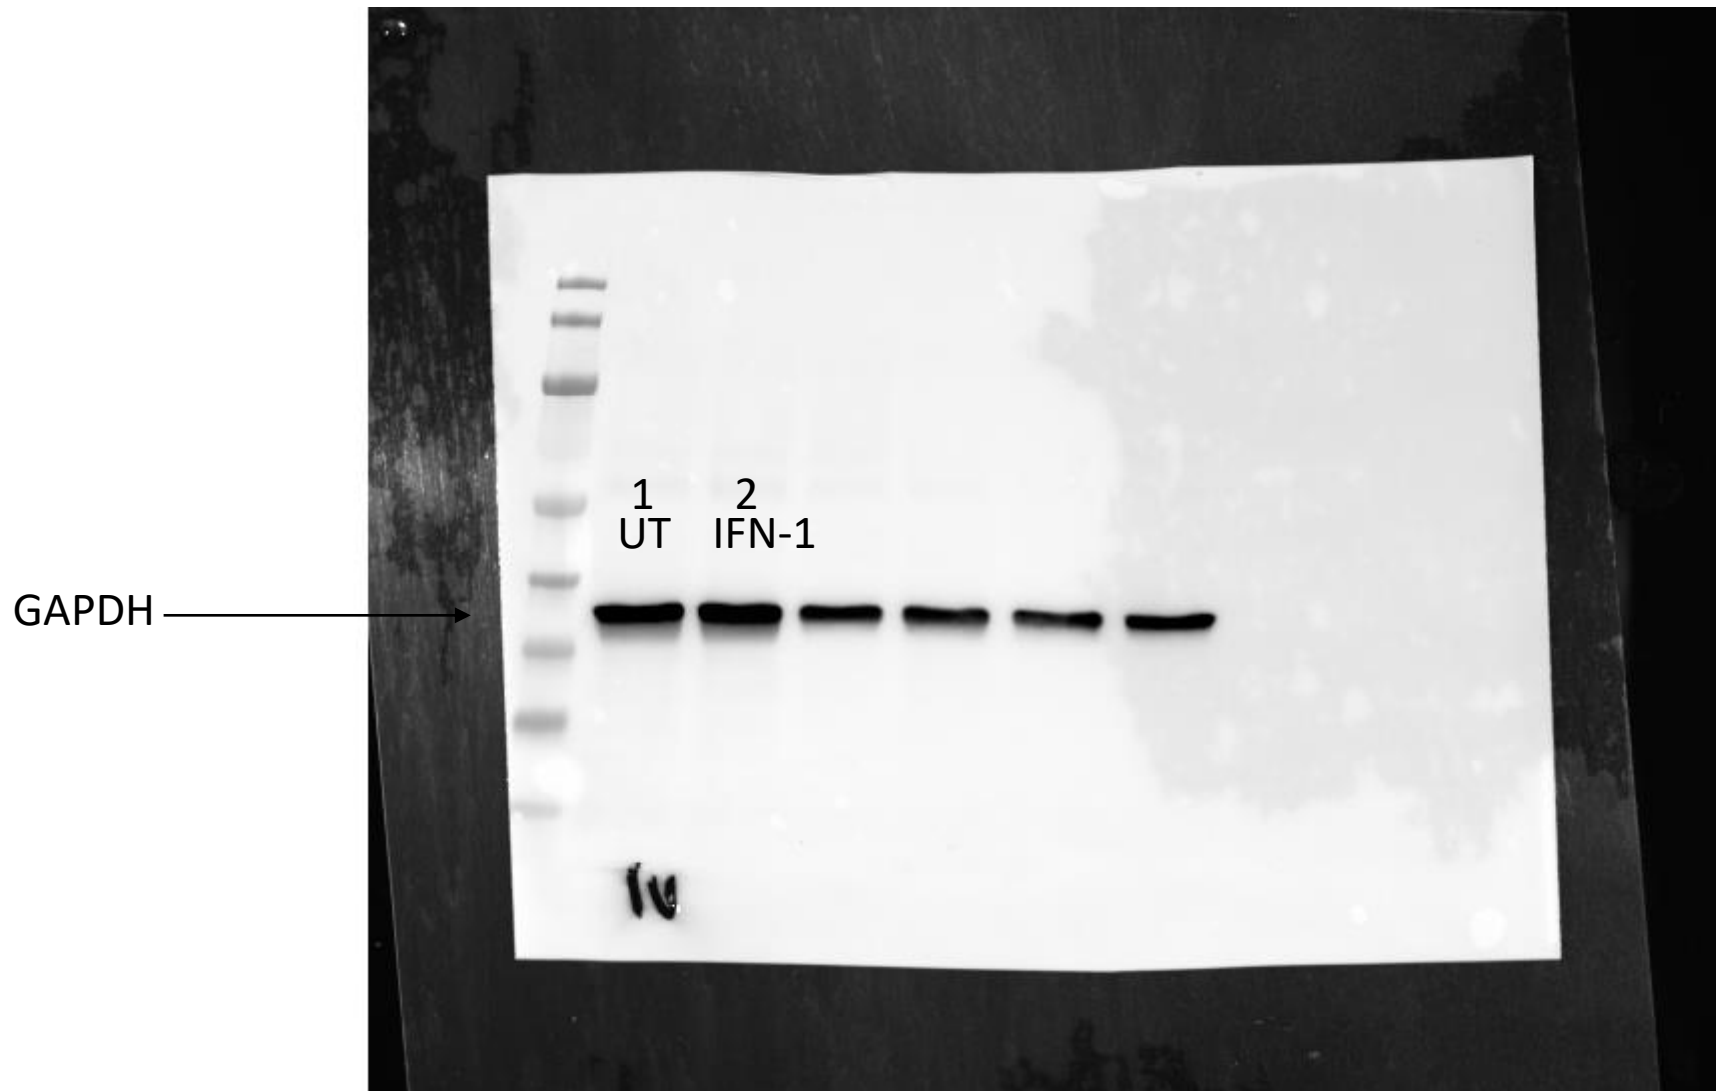

Full and uncropped western blot for Figure S3F Lanes 1, 2 are on the figure

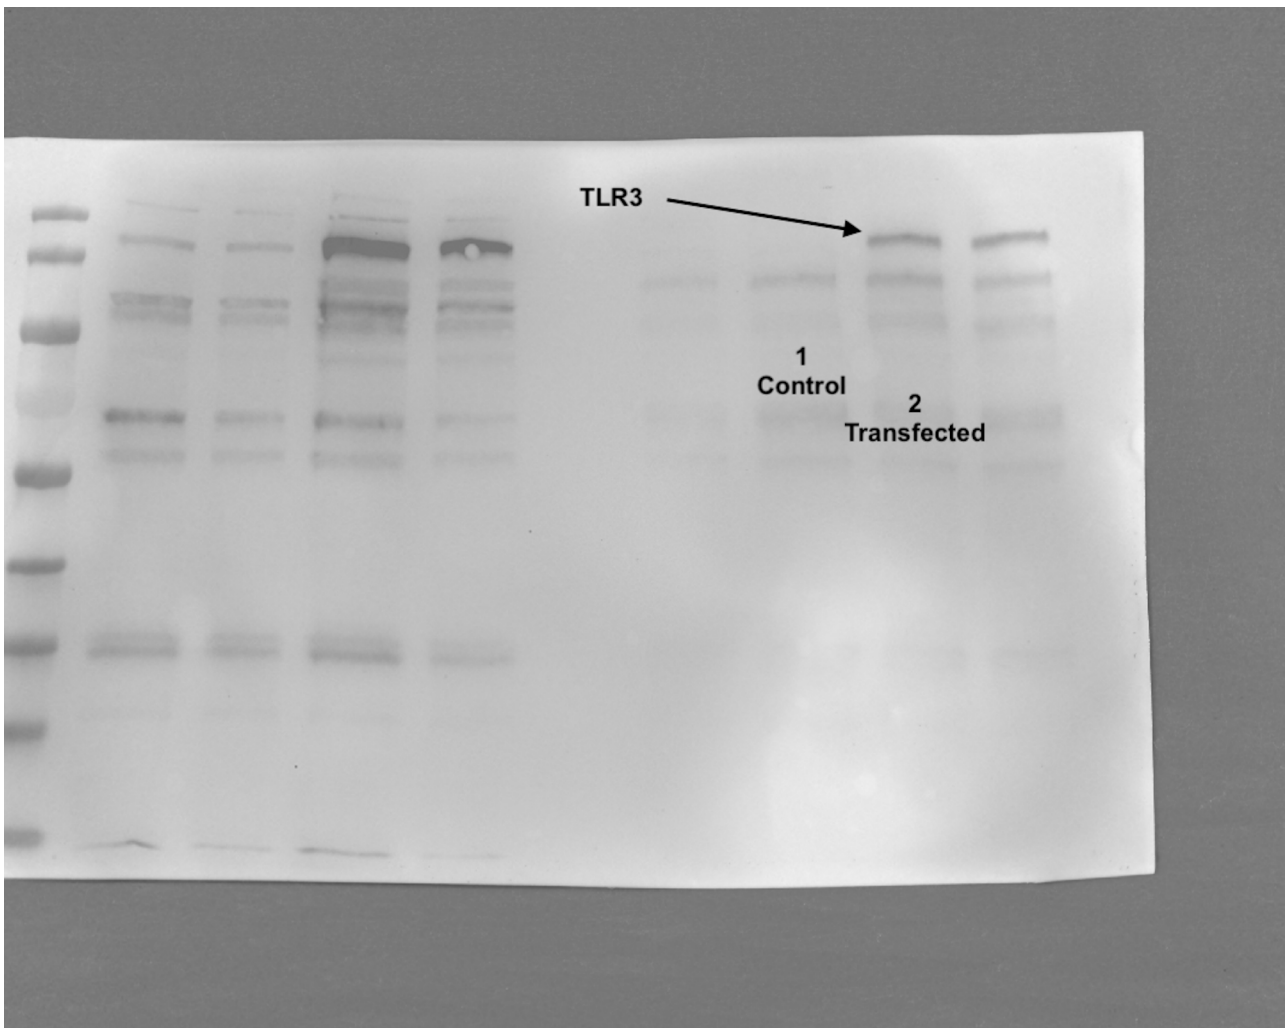

Full and uncropped western blot for Figure S3F  
Lanes 1, 2 are on the figure

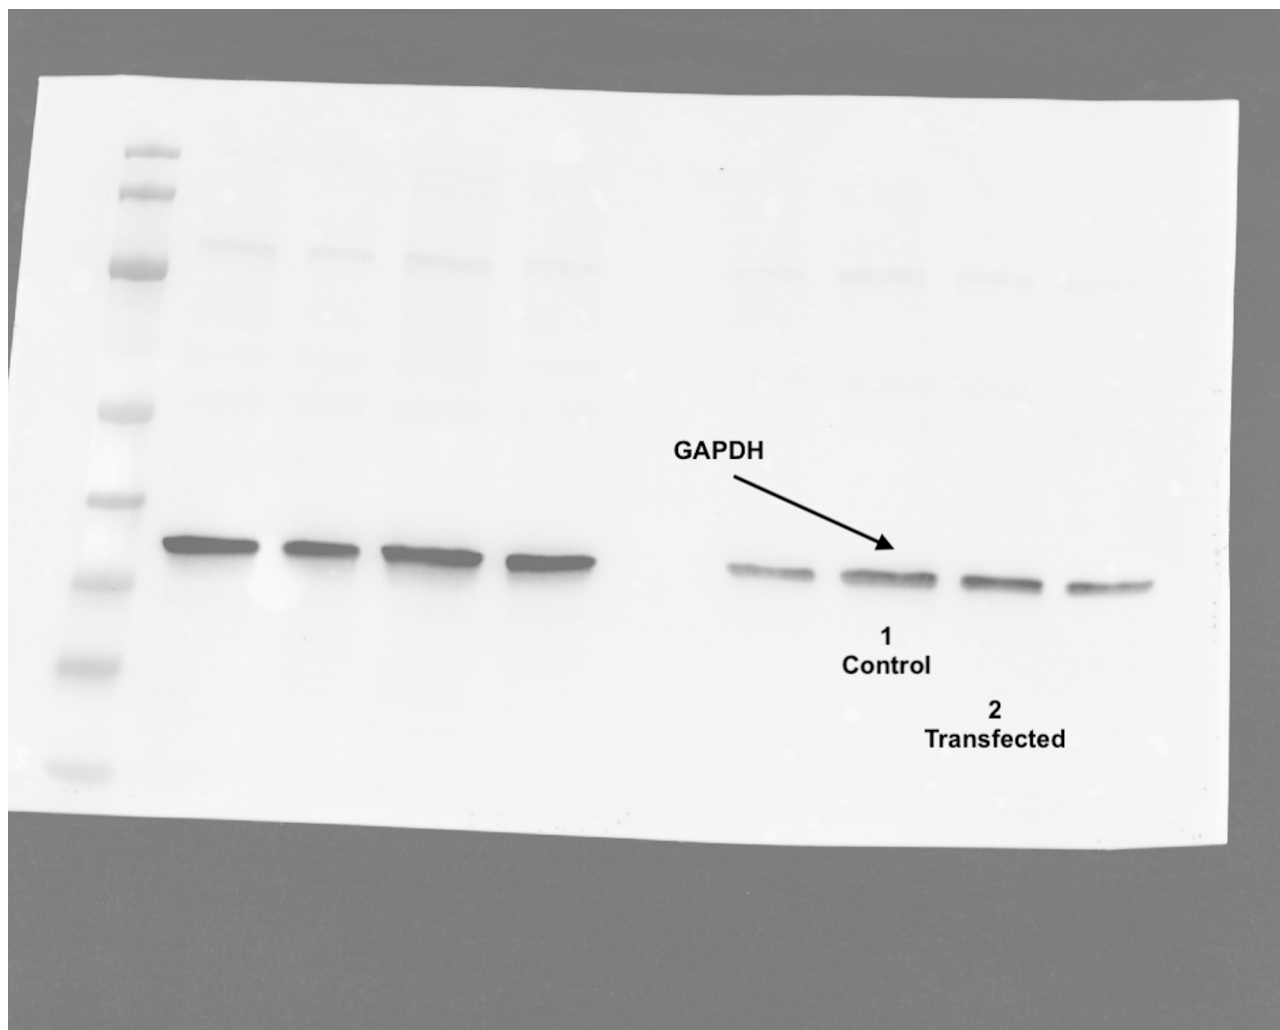

Supplement: 41420_2023_1513_MOESM3_ESM.pdf [file 41420_2023_1513_MOESM3_ESM.pdf]
