# Supplementary material for: The TLR3 L412F polymorphism prevents TLR3-mediated tumor cell death induction in pediatric sarcomas
Source: PubMed Central journal article supplement (PMC10326074; doi:10.1038/s41420-023-01513-y), 2023-07-07
Supplement: 41420_2023_1513_MOESM1_ESM.pdf [file 41420_2023_1513_MOESM1_ESM.pdf]

## SUPPLEMENTARY FIGURE LEGENDS

### **Figure S1: TLR3 has a positive prognostic value in several types of sarcomas**

**(A)** Expression level of TLR3 in normal tissues. Publicly available transcriptomic data obtained from GTEX portal. **(B)** Event-free survival probability of FP-RMS samples stratified according to TLR3 expression (\*p-value = 0.049, log-rank test). Microarray transcriptomic dataset was provided by Javed Khan's laboratory. **(C)** Overall survival probability of FN-RMS samples stratified according to TLR3 expression (p-value = 0.078, log-rank test). Publicly available E-TABM-1202 transcriptomic data were downloaded from ArrayExpress. **(D)** Overall survival probability of Ewing sarcoma samples stratified according to TLR3 expression (\*\*p-value < 0.0001, log-rank test). Publicly available transcriptomic data from Kuijjer's cohort were downloaded from R<sup>2</sup> cancer. **(E)** Overall survival probability of leiomyosarcomas (TCGA 2022-v32 Sarcoma cohort), stratified according to TLR3 expression (\*\*p-value < 0.0001, log-rank test).

### **Figure S2: Poly(I:C) treatment drives TLR3-induced cell death in pediatric sarcoma cells.**

**(A)** Immunoblot of TLR3 from MNNG/HOS osteosarcoma cells, treated or not with IFN-1 for 24 h. GAPDH is used as a loading control. One representative image out of 3 independent experiments is shown. Asterisks denote unspecific bands. **(B)** Immunoblot of TLR3 from the patient-derived cell line RMS-CLB1, treated or not with IFN-1 for 24 h. GAPDH is used as a loading control. One representative image out of 3 independent experiments is shown. Asterisks denote unspecific bands. **(C)** Viability of MNNG/HOS osteosarcoma cells treated or not with IFN-1 and/or Poly(I:C) for 72 h was analyzed by cytometry (DAPI/Acridine Orange). Mean values ± s.t.d are represented (n=3, \*p-value = 0.05). **(D)** Viability of the patient-derived RMS-CLB1 cell line treated or not with IFN-1 and/or Poly(I:C) for 72 h was analyzed by cytometry (DAPI/Acridine Orange). Mean values ± s.t.d are represented (n=3, \*p-value = 0.05).

### **Figure S3: RD and RH30 rhabdomyosarcoma cell lines homozygous for the L412F variant of TLR3 are resistant to Poly(I:C).**

**(A)** Immunoblot of TLR3 from RD rhabdomyosarcoma cells, treated or not with IFN-1 for 24 h. GAPDH is used as a loading control. One representative image out of 3 independent experiments is shown. Asterisks denote unspecific bands. **(B)** Poly(I:C) does not lead to an

increase in Caspase-3 activity in RD cells *in vitro*. Mean values  $\pm$  s.t.d of caspase-3 activity quantified according to the fluorescence emitted by cleavage of a DEVD-AFC peptide are represented (n = 4, ns p-value = 0.1714). **(C)** Immunoblot of TLR3 from RH30 rhabdomyosarcoma cells, treated or not with IFN-1 for 24 h. GAPDH is used as a loading control. One representative image out of 3 independent experiments is shown. Asterisks denote unspecific bands. **(D)** Viability of RH30 RMS cells treated or not with IFN-1 and/or Poly(I:C) for 72 h was analyzed by cytometry (DAPI/Acridine Orange). Mean values  $\pm$  s.t.d are represented (n = 3, ns p-value = 0.1). **(E-F)** Transient transfection of the WT allele of TLR3 is sufficient to restore cell death upon Poly(I:C) treatment in RD cells. **(E)** Viability of RD rhabdomyosarcoma cells transfected or not with TLR3 and treated with Poly(I:C) for 48 h was analyzed by cytometry (DAPI/Acridine Orange). Mean values  $\pm$  s.t.d are represented (n=3, \*p-value < 0.05). **(F)** Immunoblot of transfected CFP tagged-TLR3 in RD rhabdomyosarcoma cells. One representative image out of 3 independent experiments is shown. Transfected and endogenous forms of TLR3 are indicated. Asterisks denote unspecific bands. Ctl: RD transfected with an empty vector. Transf. : RD transfected with a CFP-TLR3 L412 encoding vector.

**A**

## Bulk tissue gene expression for TLR3 (ENSG00000164342.12)

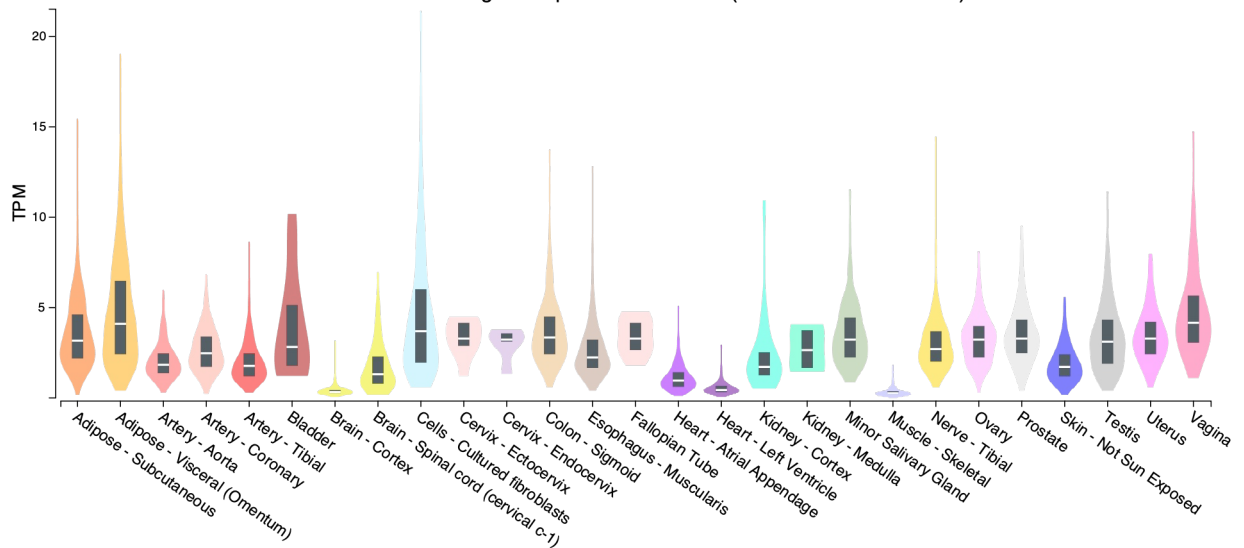**B**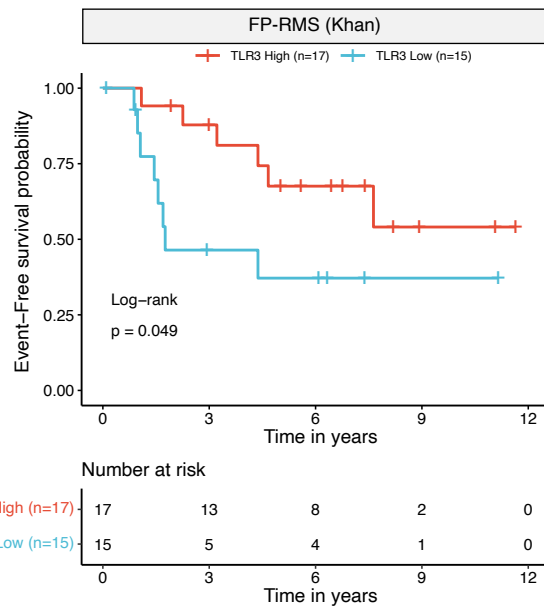**C**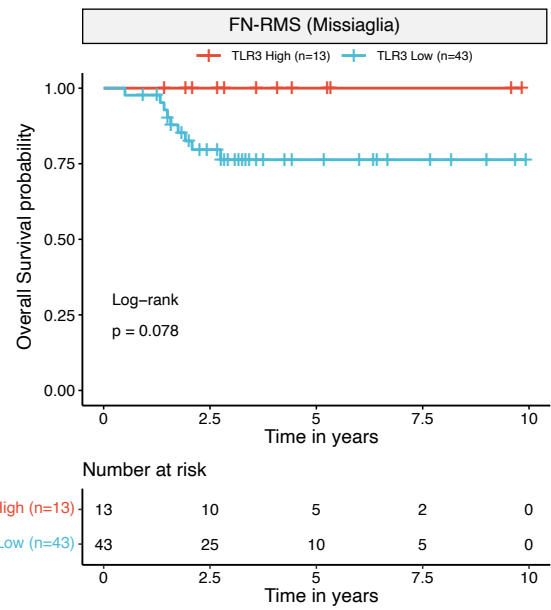**D**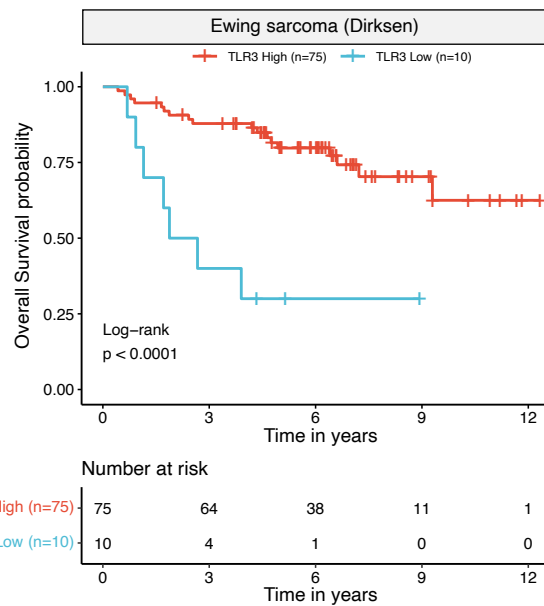**E**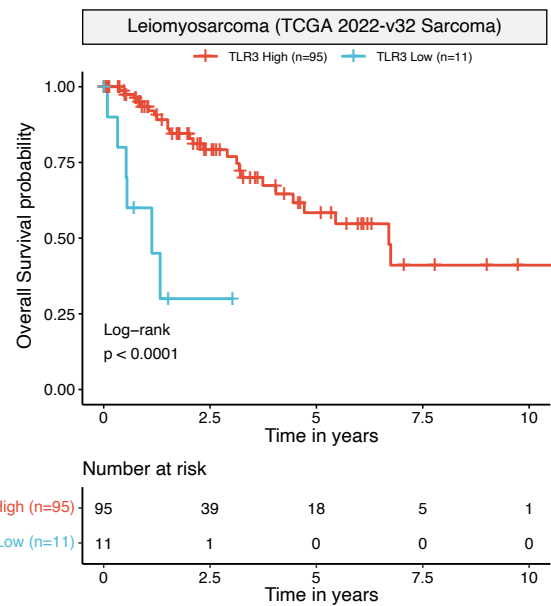

**A**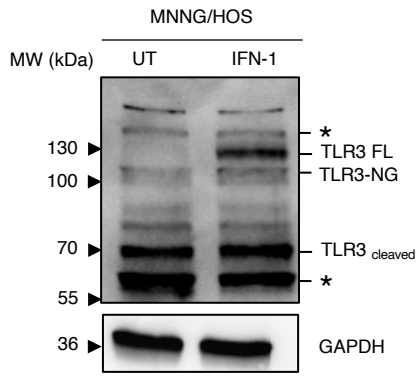**B**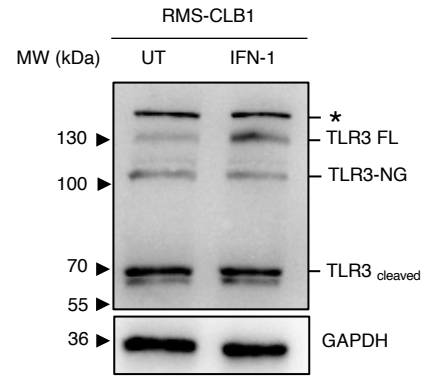**C**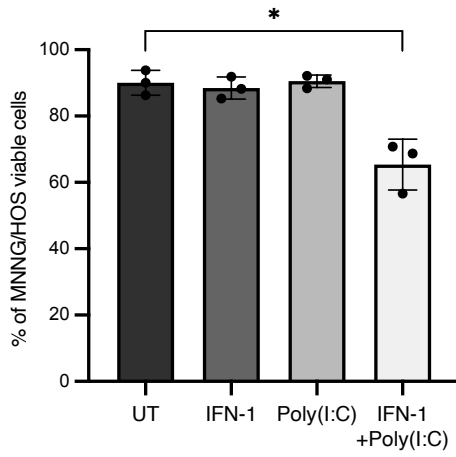**D**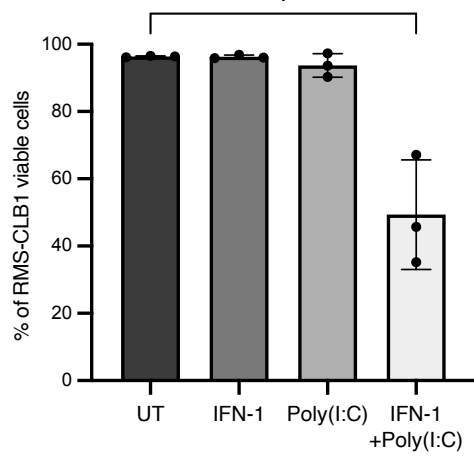

**A**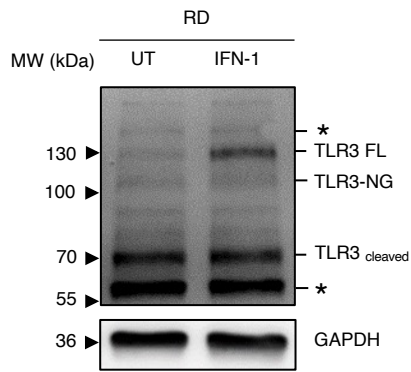**B**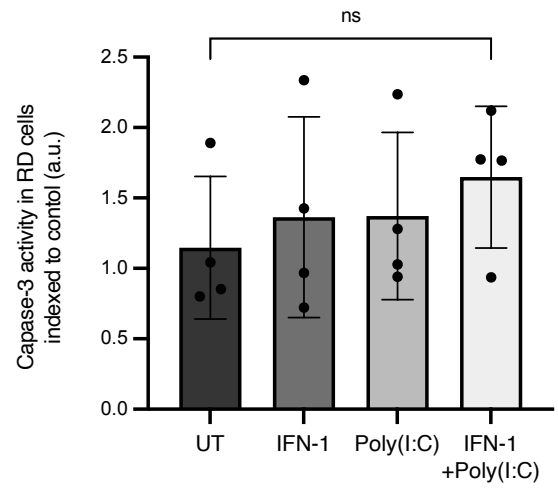**C**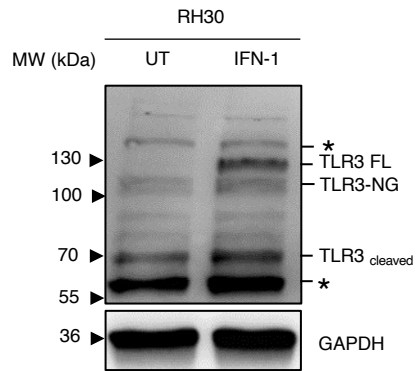**D**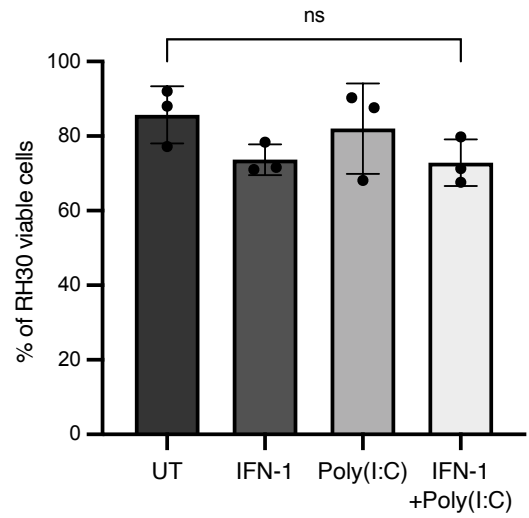**E**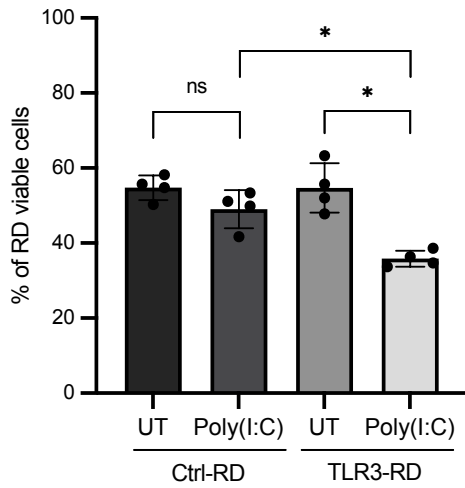**F**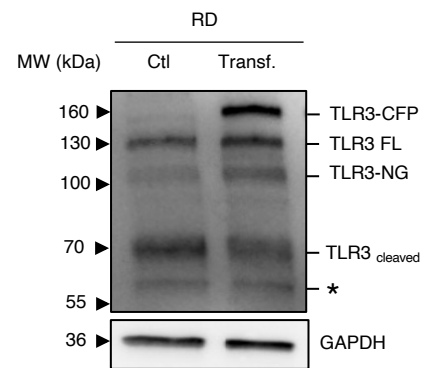

## Supplementary Table 1 – Cutoffs used for the survival analyses

| Figure | Dataset               | Tumor          | TLR3 Cutoff | Cutoff method | Log2 normalised expression |
|--------|-----------------------|----------------|-------------|---------------|----------------------------|
| 1B     | Missiaglia            | FP-RMS         | 2,659058    | Maxstat       | Yes                        |
| 1C     | Kuijjer               | Osteosarcoma   | 176,7       | KaplanScan    | No                         |
| S1A    | Khan                  | FP-RMS         | 7,262       | Maxstat       | Yes                        |
| S1B    | Missiaglia            | FN-RMS         | 3,427901    | Maxstat       | Yes                        |
| S1C    | Dirksen               | Ewing Sarcoma  | 31,8        | KaplanScan    | No                         |
| S1C    | TCGA 2022-v32 Sarcoma | Leiomyosarcoma | 1,95        | Maxstat       | Yes                        |
